# Supplementary material for: Synthesis and evaluation of bifunctional DFO2K: a modular chelator with ideal properties for zirconium-89 chelation
Source: Royal Society of Chemistry journal article supplement (doi:10.1039/d4dt01830c), 2024-01-01
Supplement: d4dt01830c1.pdf [file d4dt01830c1.pdf]

## Supporting Information

### Synthesis and Evaluation of Bifunctional DFO2K: a Modular Chelator with Ideal Properties for Zirconium-89 Chelation

Akam K. Salih<sup>1</sup>, Elaheh Khozeimeh Sarbisheh<sup>2</sup>, Shvan J. Raheem<sup>1</sup>, Moralba Dominguez-Garcia<sup>1</sup>, Hillary Mehlhorn<sup>1</sup>, Eric W. Price<sup>1,\*</sup>.

<sup>1</sup> Department of Chemistry, College of Arts and Science, University of Saskatchewan, Saskatoon, SK, 110 Science Place, S7N-5C9, Canada

<sup>2</sup> Life Sciences Division, TRIUMF, Vancouver, BC, Canada

\* Corresponding author: Eric Price [eric.price@usask.ca](mailto:eric.price@usask.ca)

#### Keywords

Desferrioxamine, hydroxamic acid, chelator, radiometal, radiochemistry, PET imaging, zirconium-89, theranostic, density functional theory calculations, DFT

**Disclosures:** None.

### DFO-Lys(Z)-Boc (1)

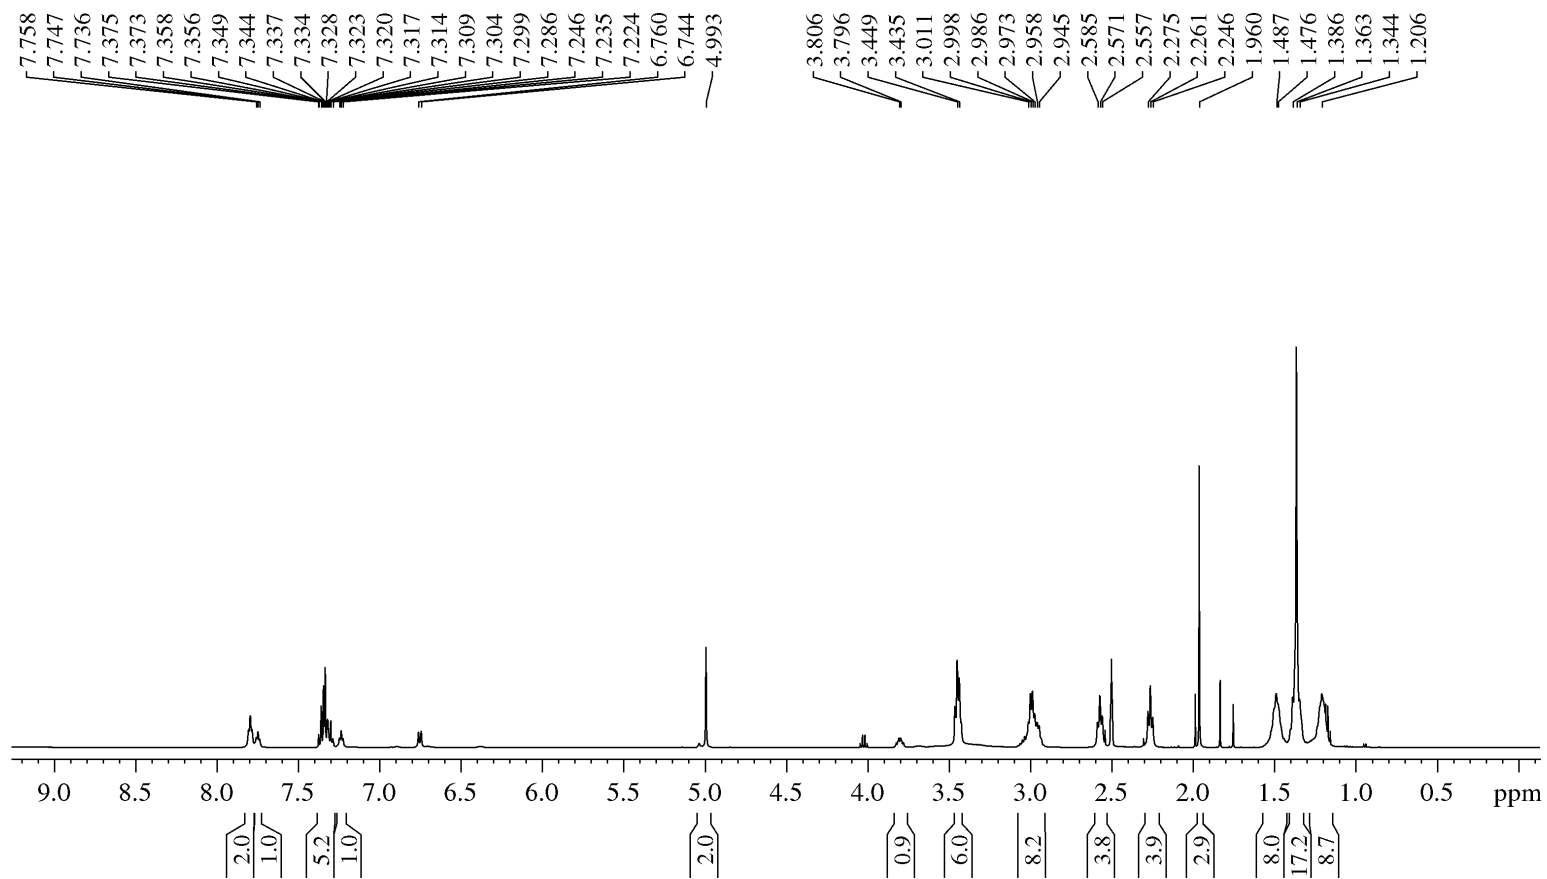

**Figure S1.** <sup>1</sup>H NMR spectrum of compound 1 in (CD<sub>3</sub>)<sub>2</sub>SO. The signals at 1.17, 1.99, 4.02 ppm are assigned to residual ethyl acetate and signal at 2.50 is assigned to residual DMSO in the NMR sample.

DFO-Lys(Z)-Boc (1)

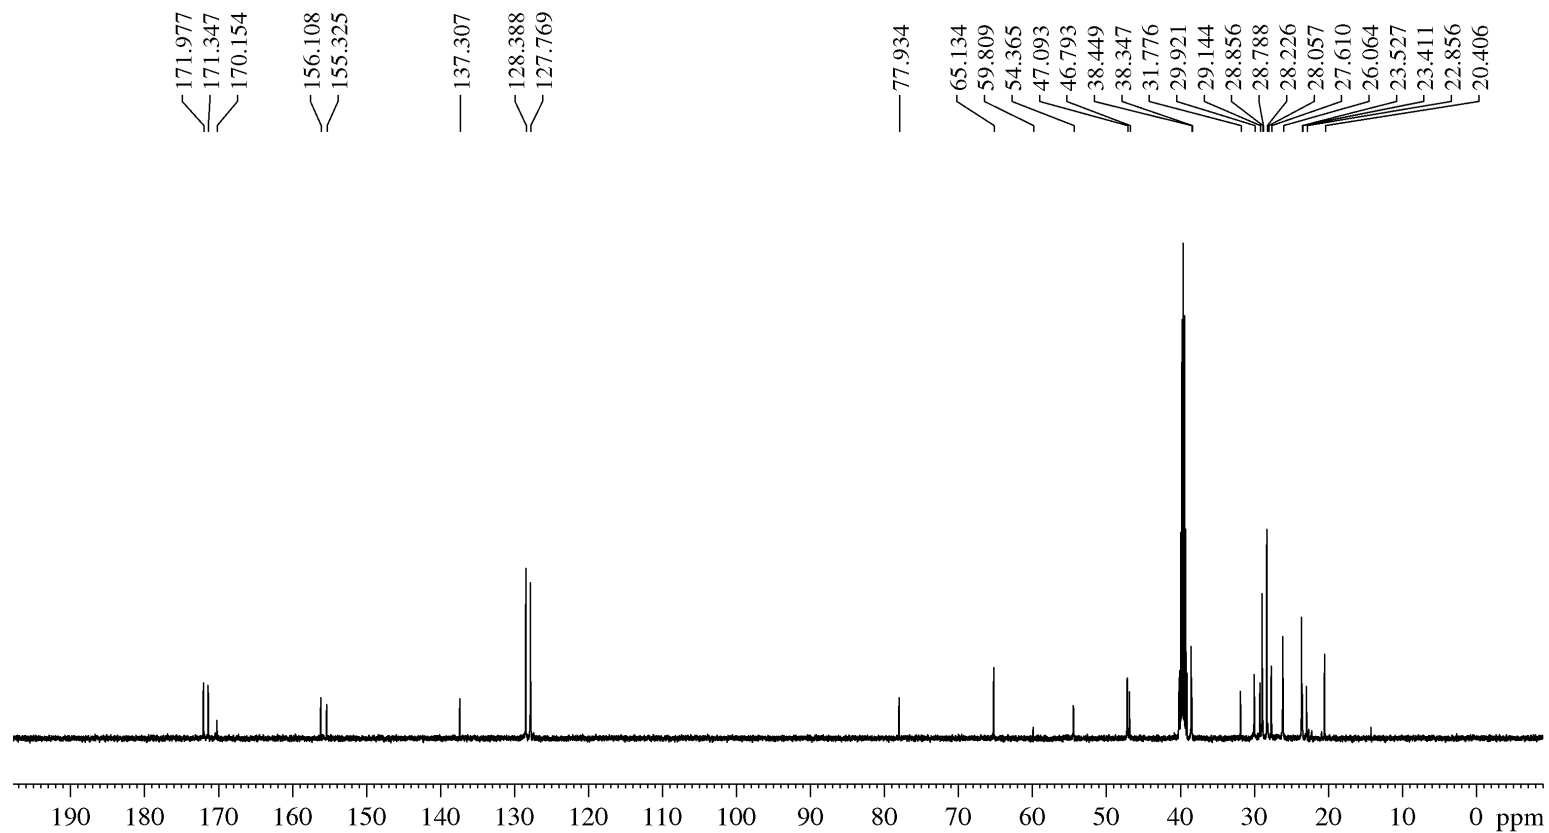

Figure S2. <sup>13</sup>C NMR spectrum of compound 1 in (CD<sub>3</sub>)<sub>2</sub>SO.

DFO-Lys(Z)-NH<sub>2</sub> (2)

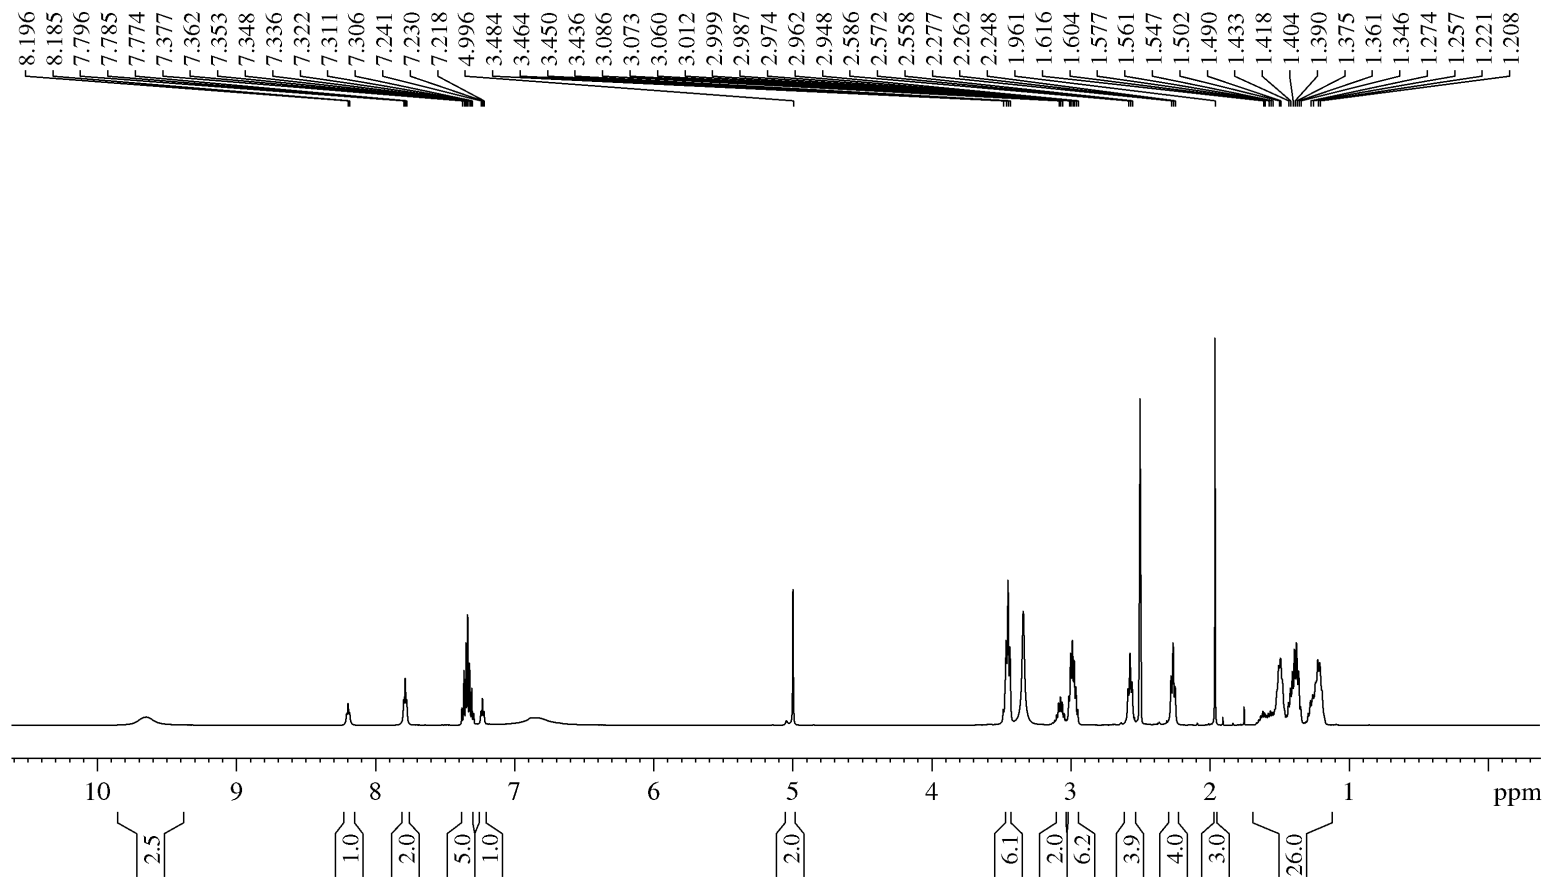

Figure S3. <sup>1</sup>H NMR spectrum of compound **2** in (CD<sub>3</sub>)<sub>2</sub>SO. The signal at 2.50 is assigned to residual DMSO in the NMR sample.

DFO-Lys(Z)-NH<sub>2</sub> (2)

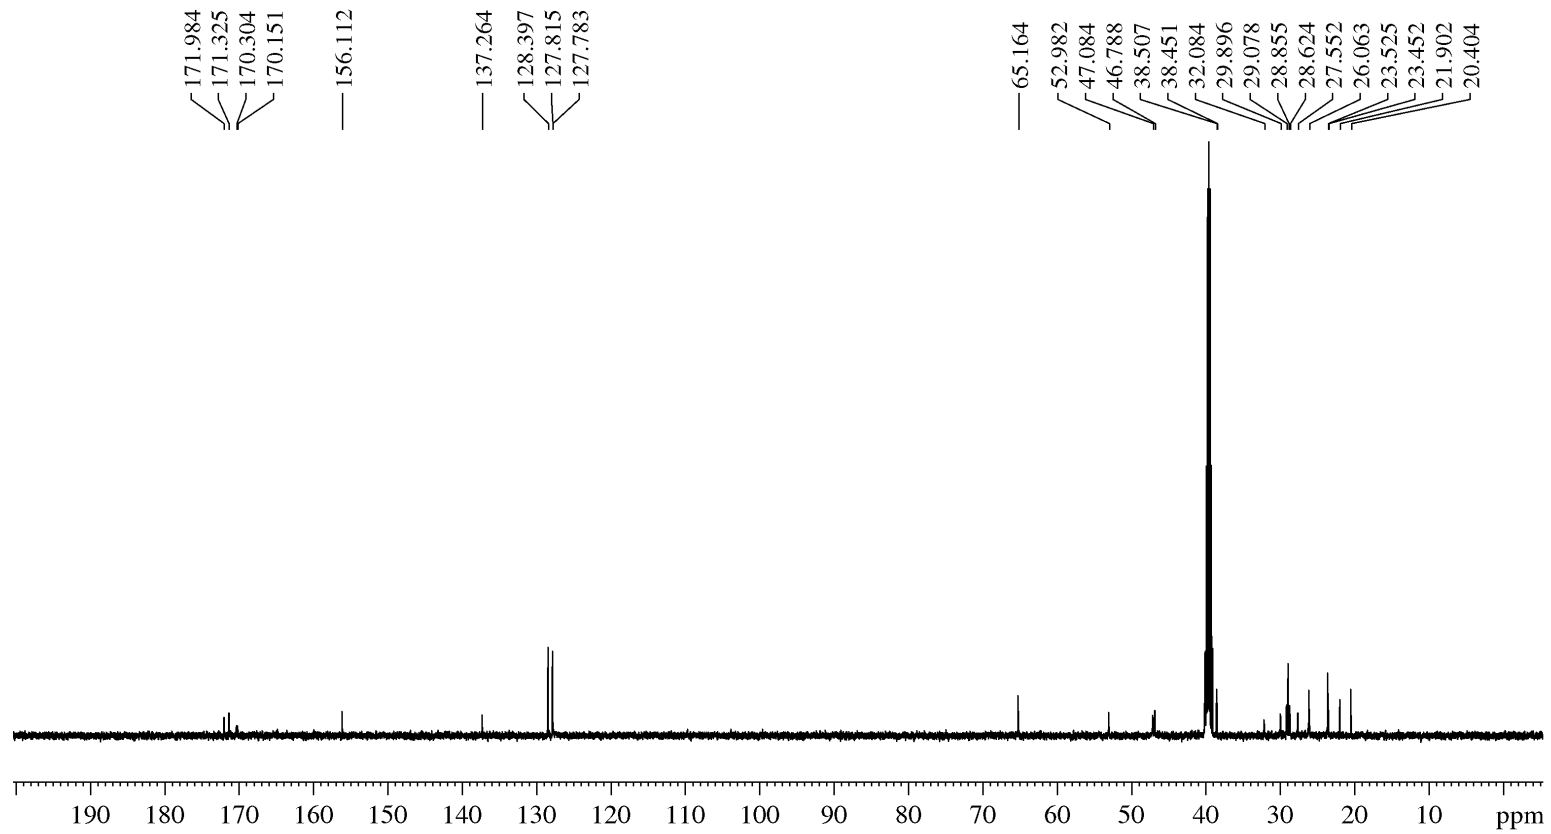

Figure S4. <sup>13</sup>C NMR spectrum of compound 2 in (CD<sub>3</sub>)<sub>2</sub>SO.

DFO2-Lys-Z (3)

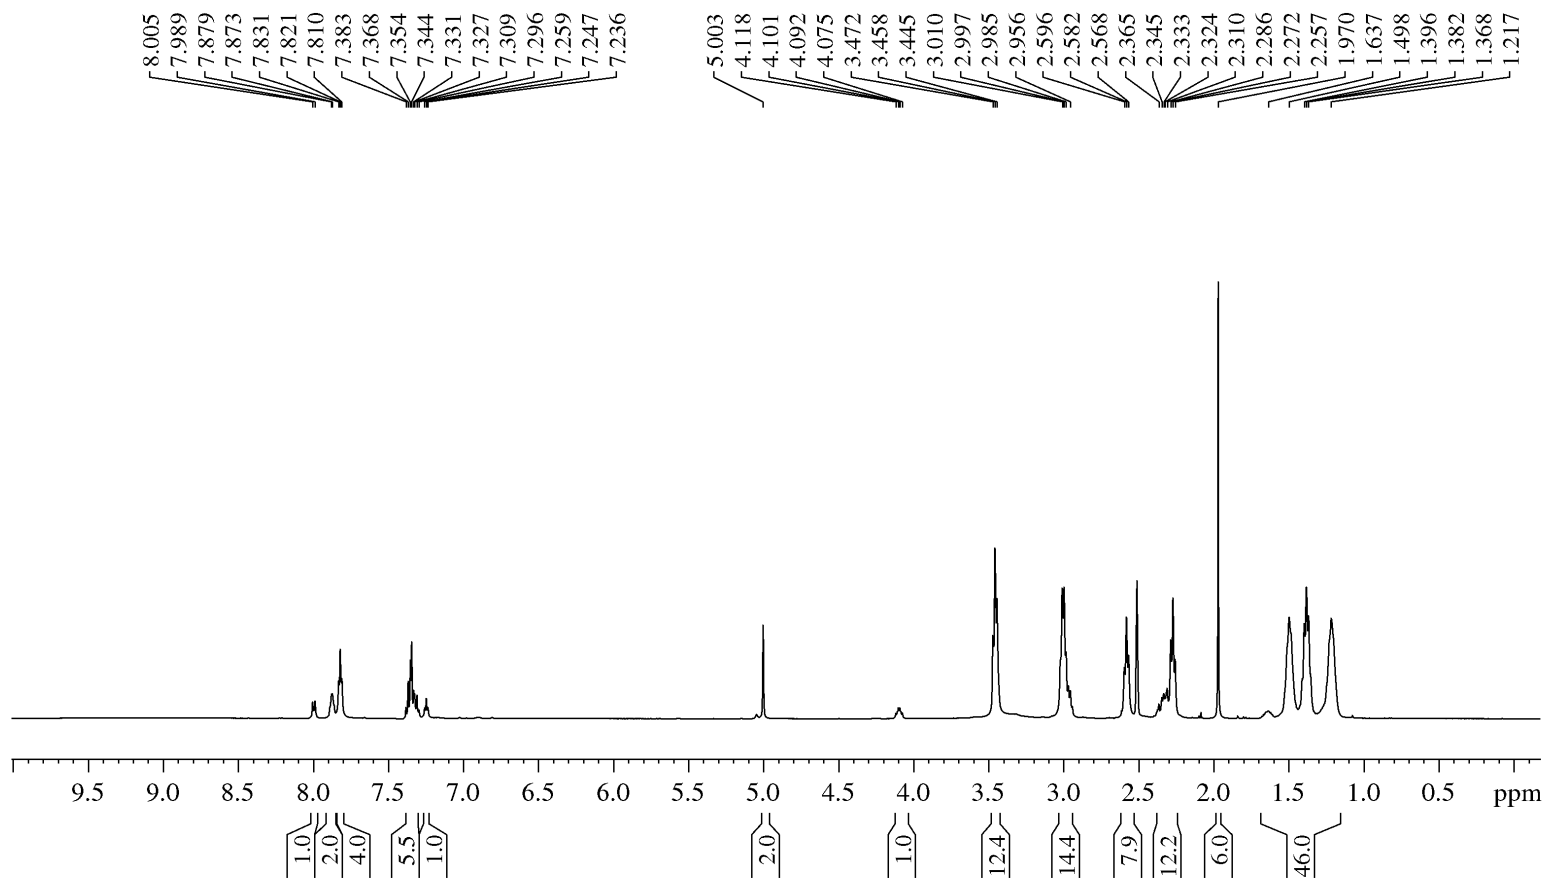

Figure S5. <sup>1</sup>H NMR spectrum of compound 3 in (CD<sub>3</sub>)<sub>2</sub>SO. The signal at 2.50 is assigned to residual DMSO in the NMR sample.

DFO2-Lys-Z (3)

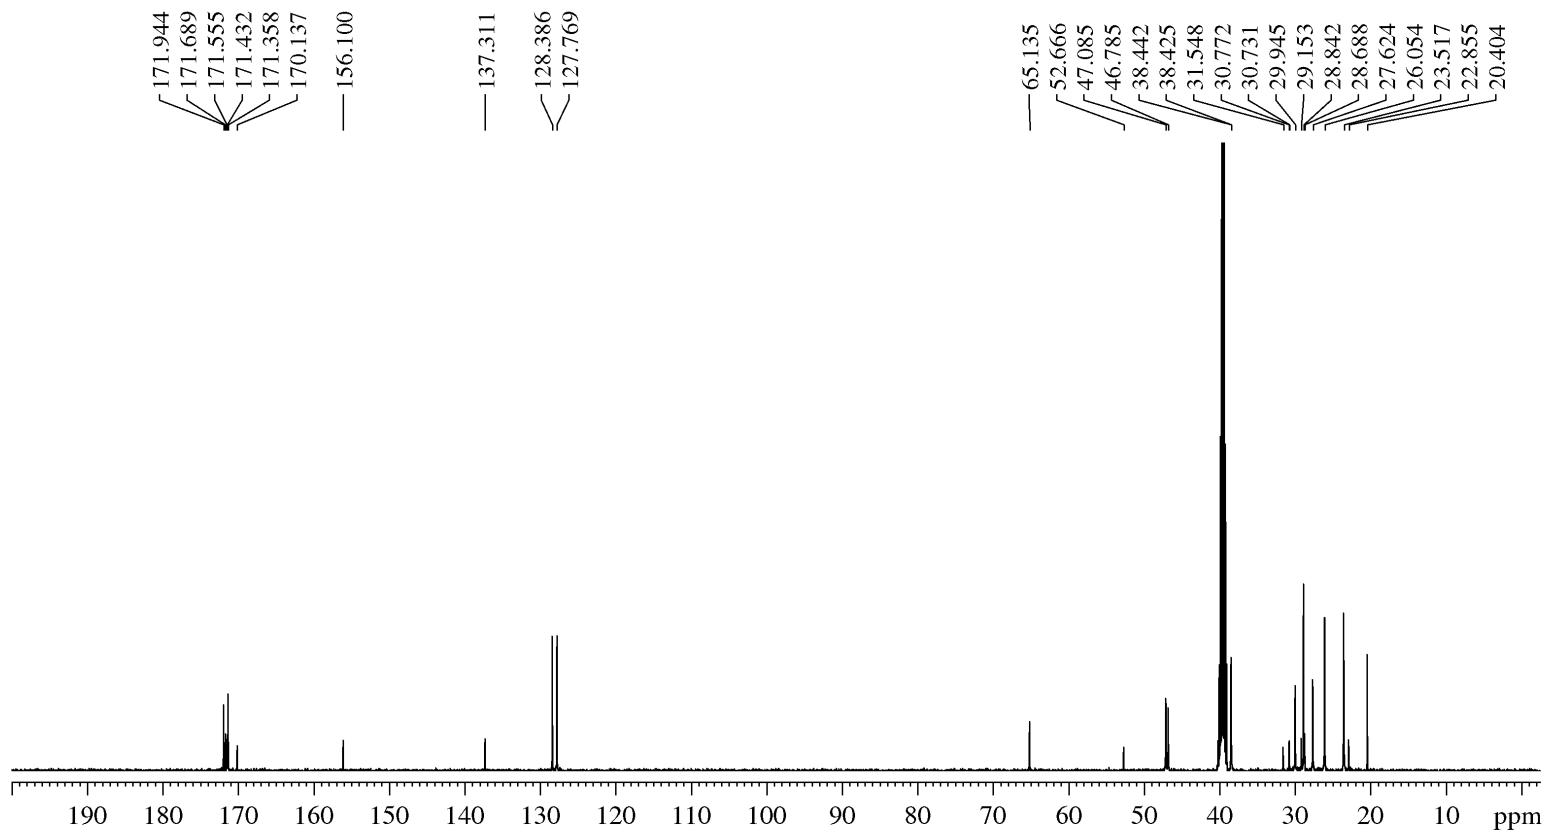

Figure S6.  $^{13}\text{C}$  NMR spectrum of compound 3 in  $(\text{CD}_3)_2\text{SO}$ .

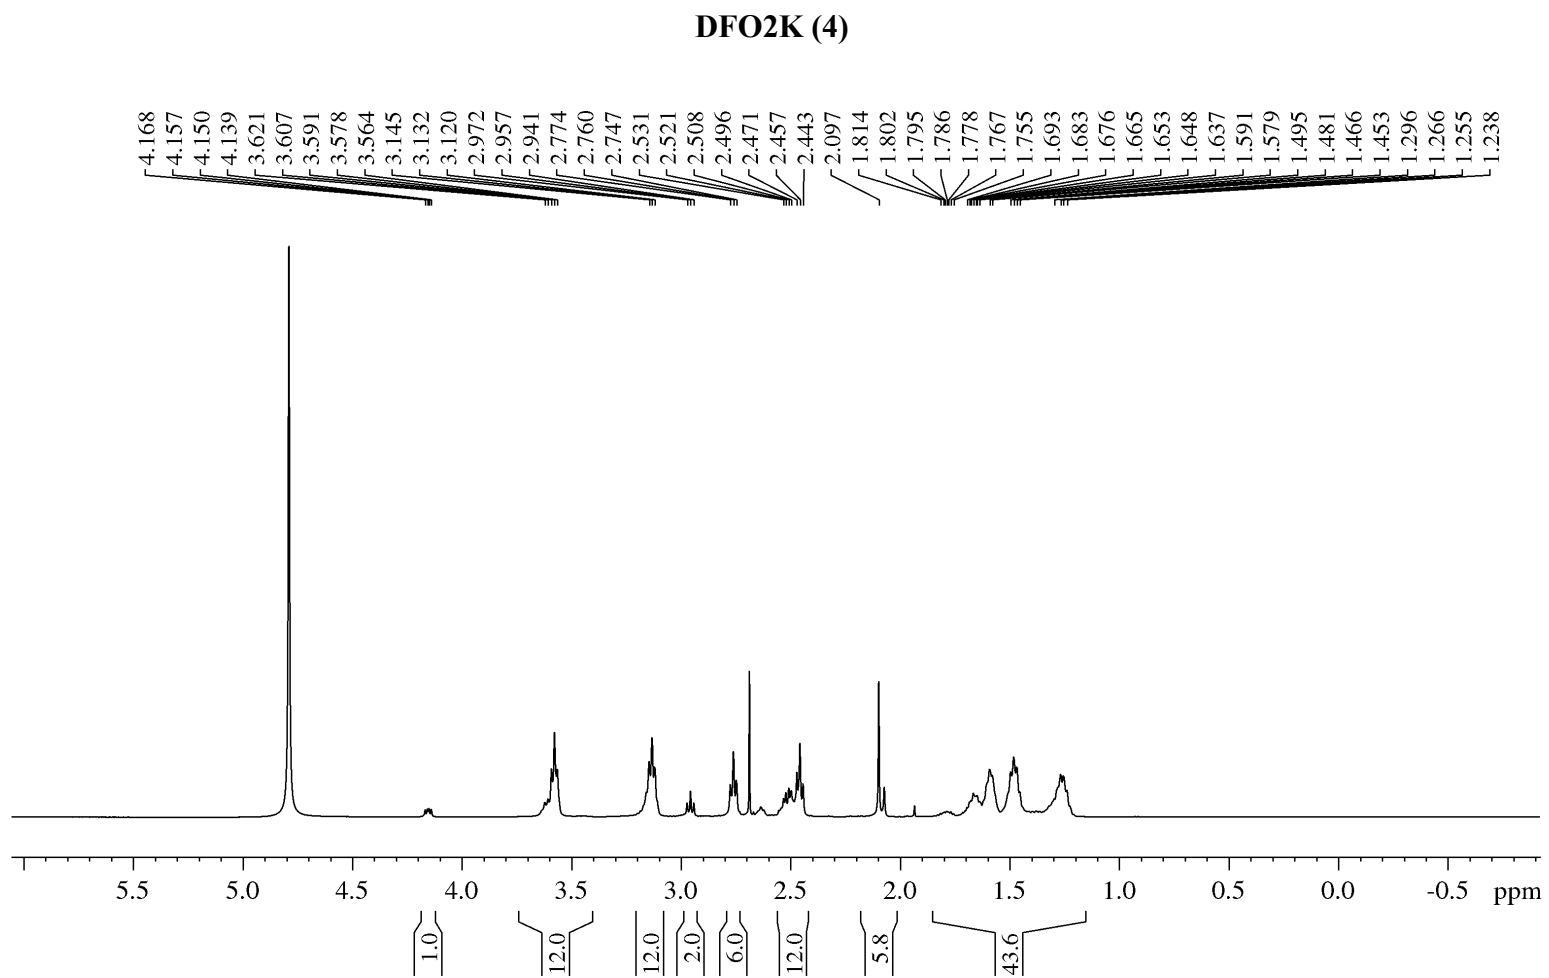

**Figure S7.**  $^1\text{H}$  NMR spectrum of compound **4** in  $\text{D}_2\text{O}$ . The signal at 4.79 is assigned to residual  $\text{H}_2\text{O}$  in the NMR sample.



**DFO2K (4)**

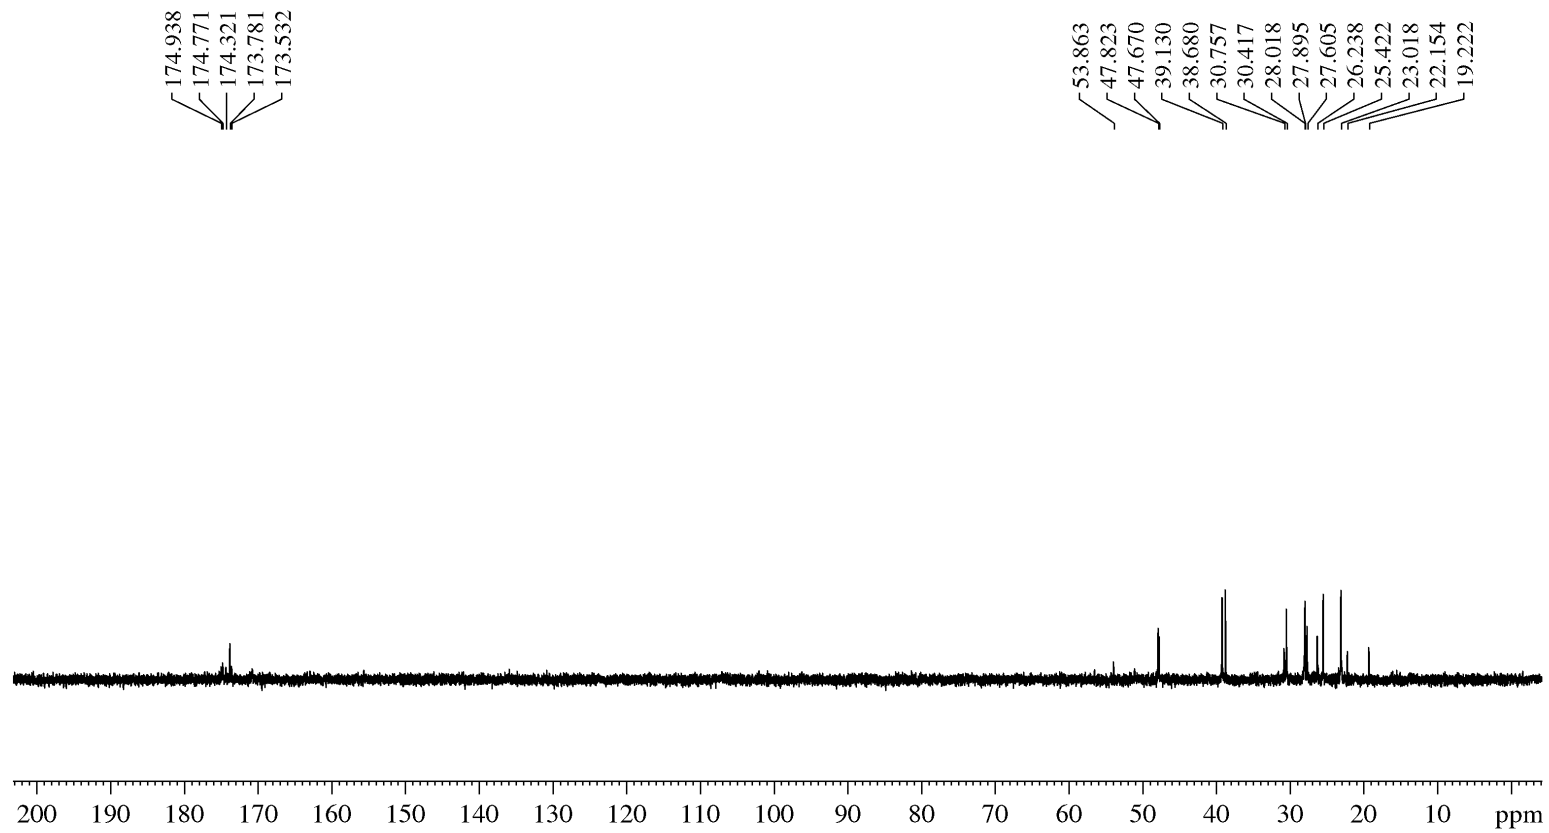

**Figure S8.** <sup>13</sup>C NMR spectrum of compound **4** in D<sub>2</sub>O.

### DFO2K (4)

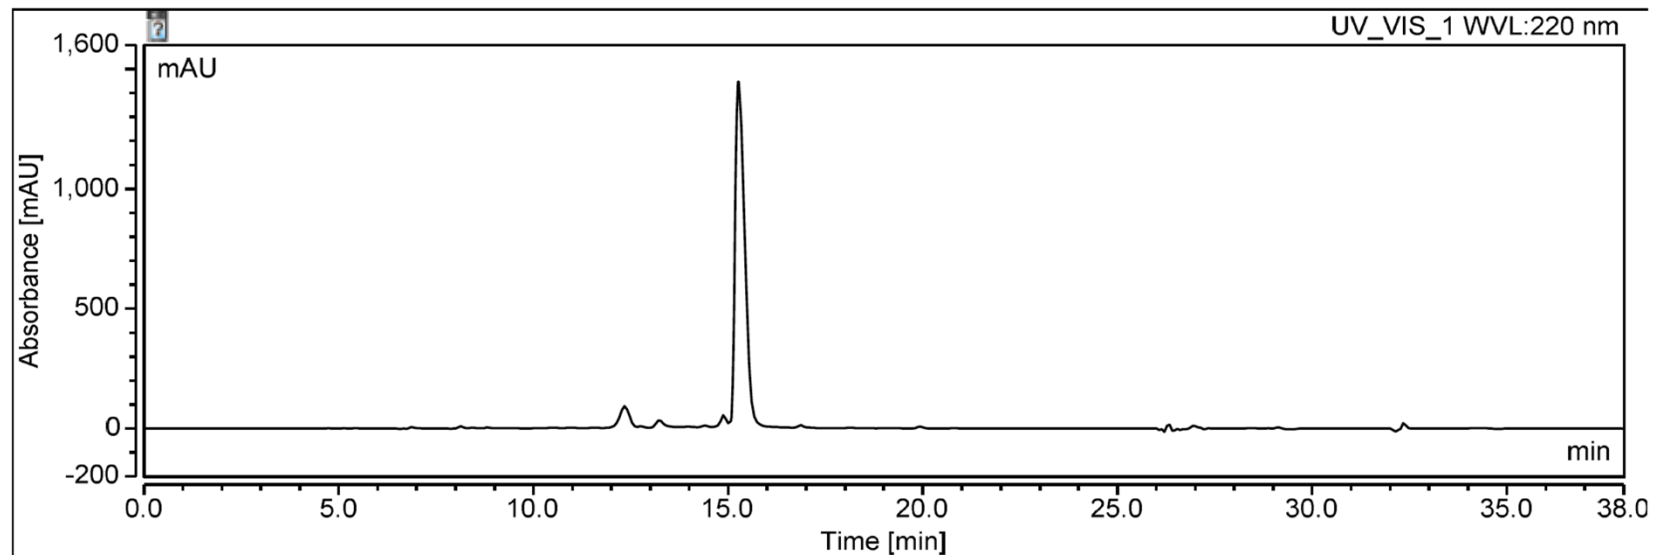

**Figure S9.** Analytical HPLC chromatogram for semi-pure DFO2K. HPLC conditions: C18 Inspire analytical DIKMA; 5  $\mu\text{m}$ , 250  $\times$  10.0 mm; (15 – 30% acetonitrile in water (0.1% formic acid); flow rate, 2 mL/min,  $t_R$  = 15.3 min)

[<sup>Nat</sup>Zr]Zr-DFO2K (5)

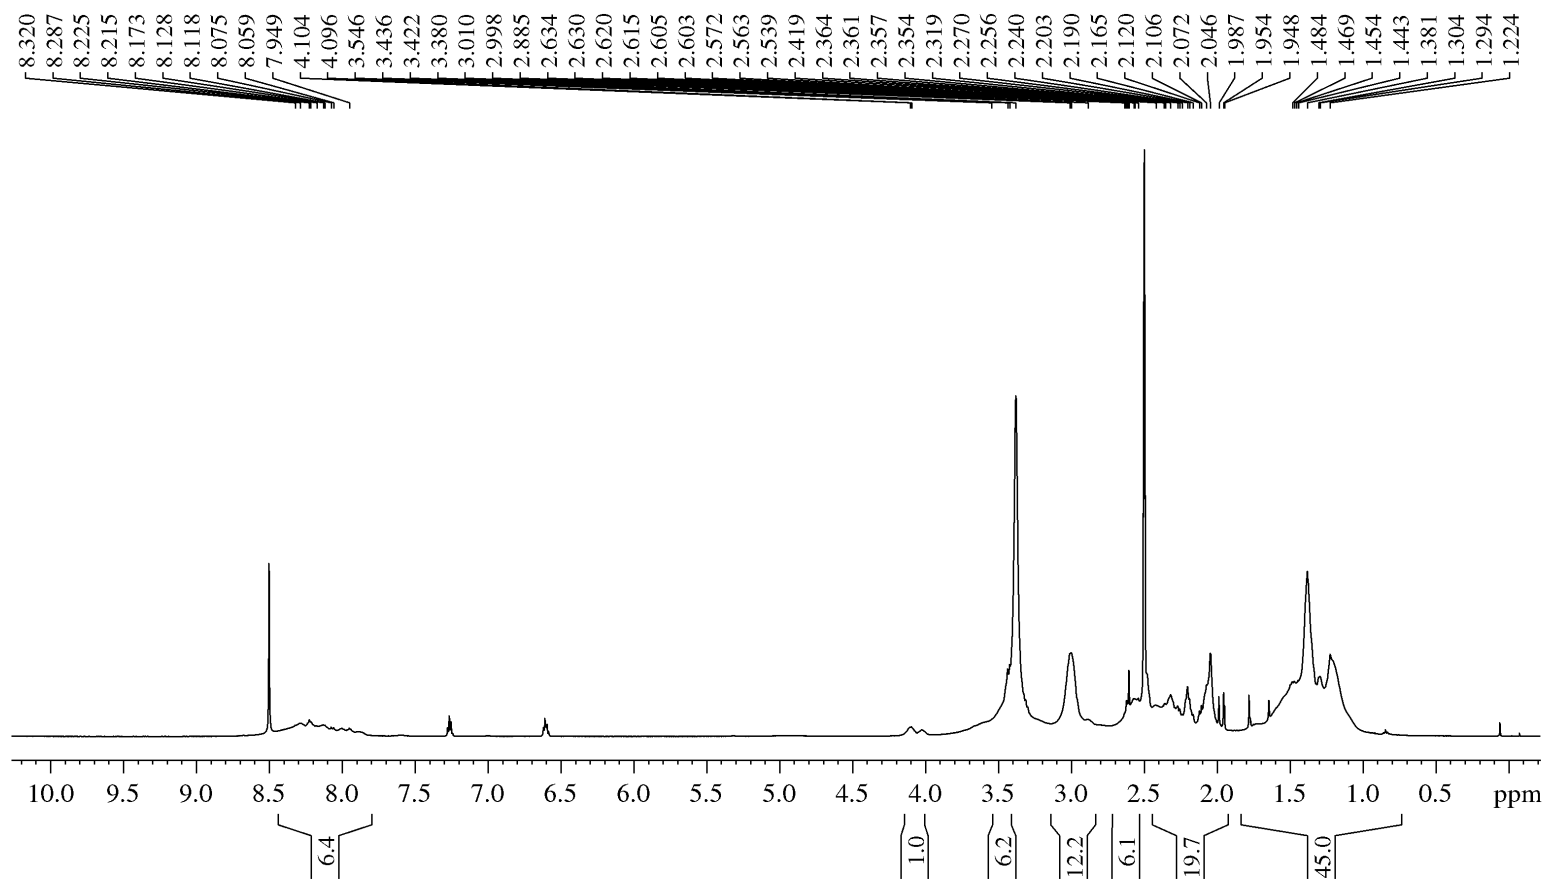

**Figure S10.** <sup>1</sup>H NMR spectrum of compound **5** in (CD<sub>3</sub>)<sub>2</sub>SO. The signal at 2.50 is assigned to residual DMSO and the signal at 3.33 pm is assigned to residual H<sub>2</sub>O in the NMR sample.

[<sup>Nat</sup>Zr]Zr-DFO2K (5)

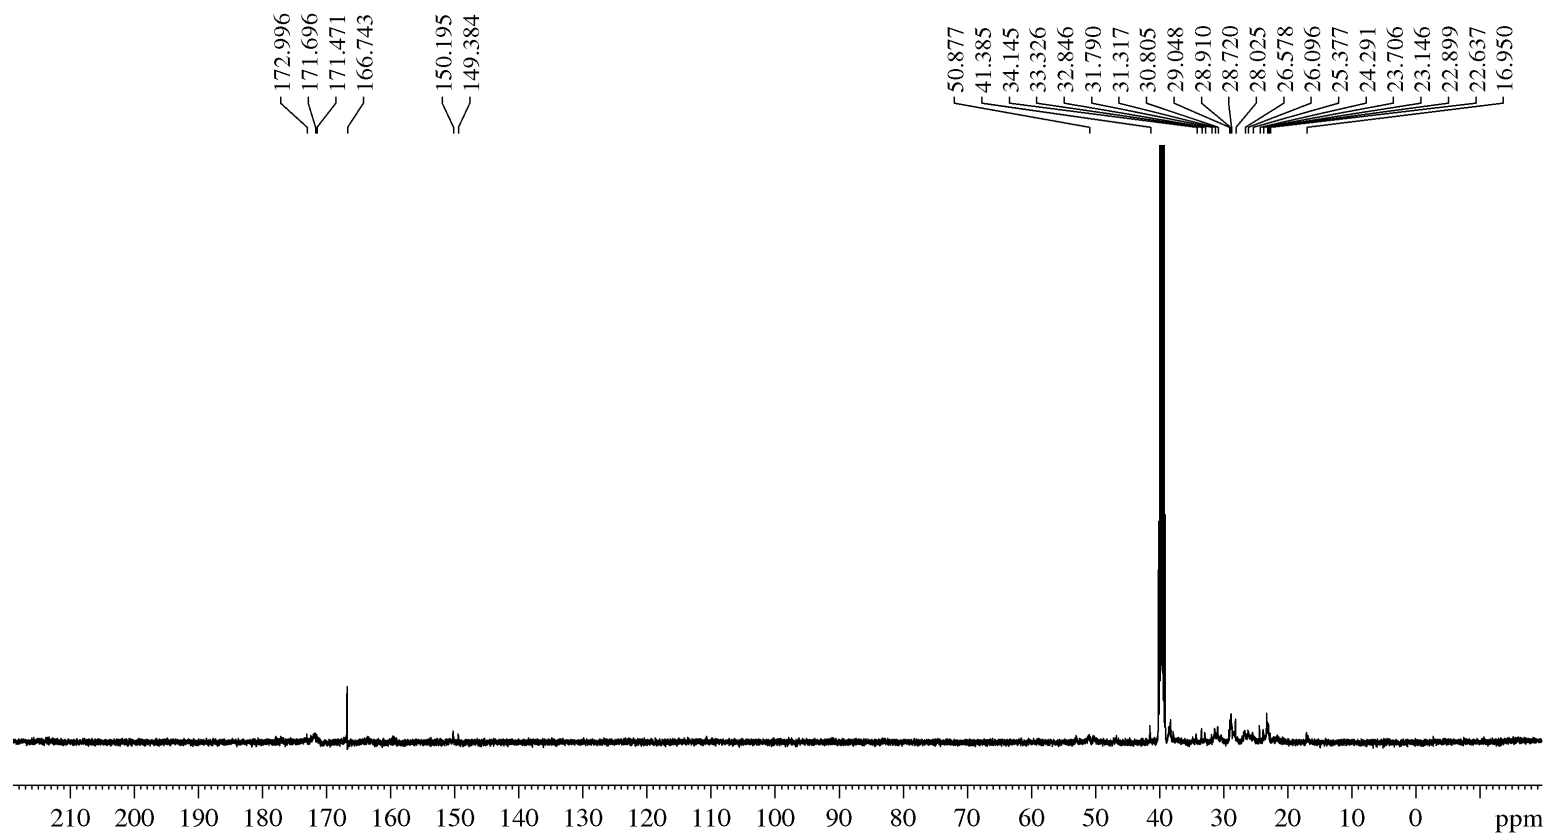

Figure S11. <sup>13</sup>C NMR spectrum of compound 5 in (CD<sub>3</sub>)<sub>2</sub>SO.

*p*-Ph-SCN-DFO2K (6)

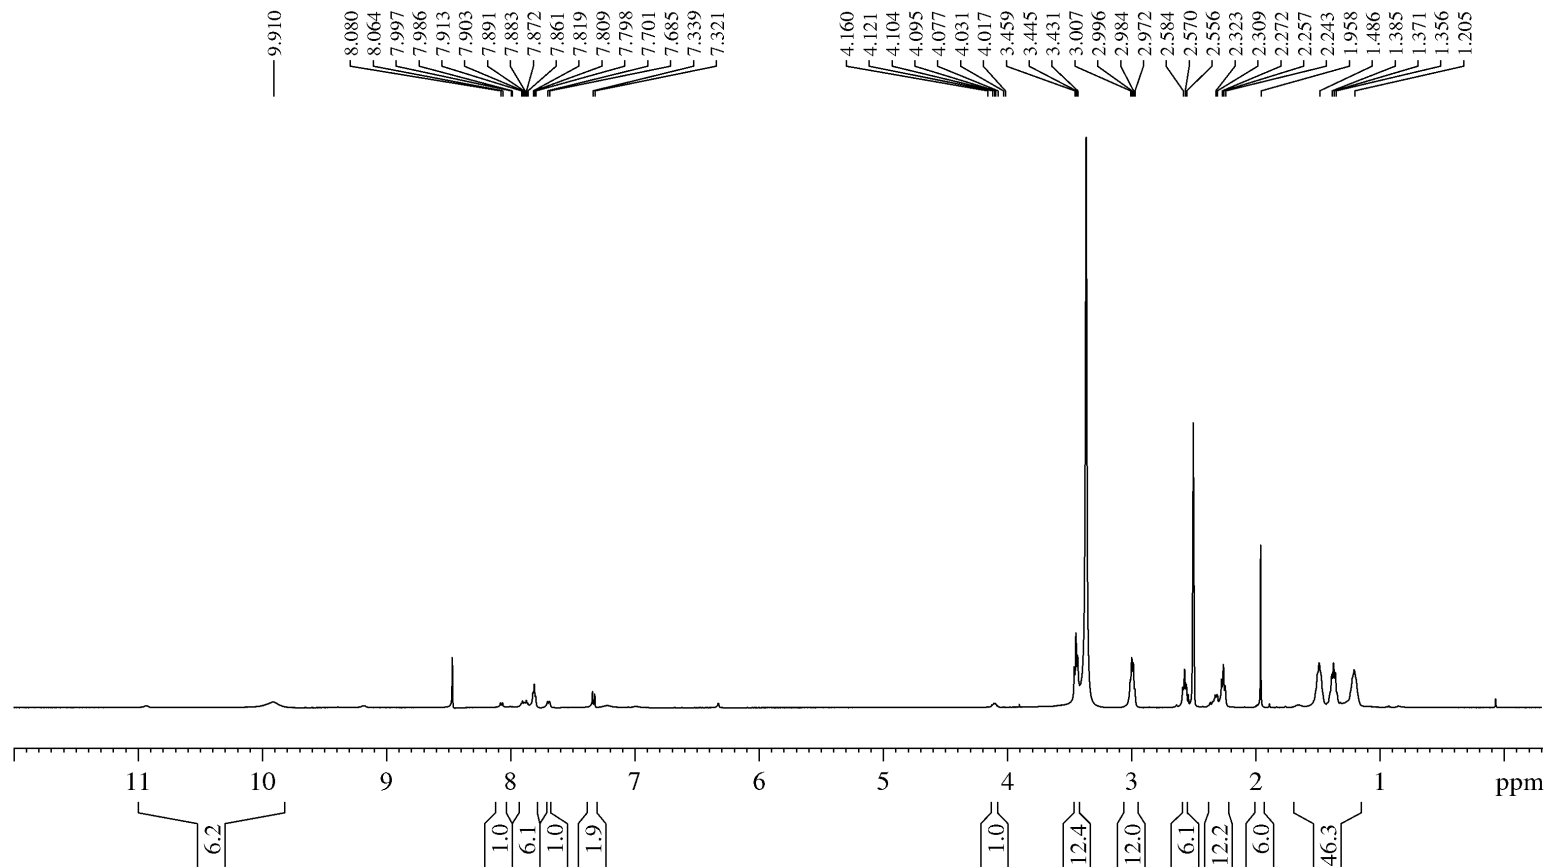

**Figure S12.**  $^1\text{H}$  NMR spectrum of compound **6** in  $(\text{CD}_3)_2\text{SO}$ . The signal at 2.50 is assigned to residual DMSO and the signal at 3.33 ppm is assigned to residual  $\text{H}_2\text{O}$  in the NMR sample.

*p*-Ph-SCN-DFO2K (6)

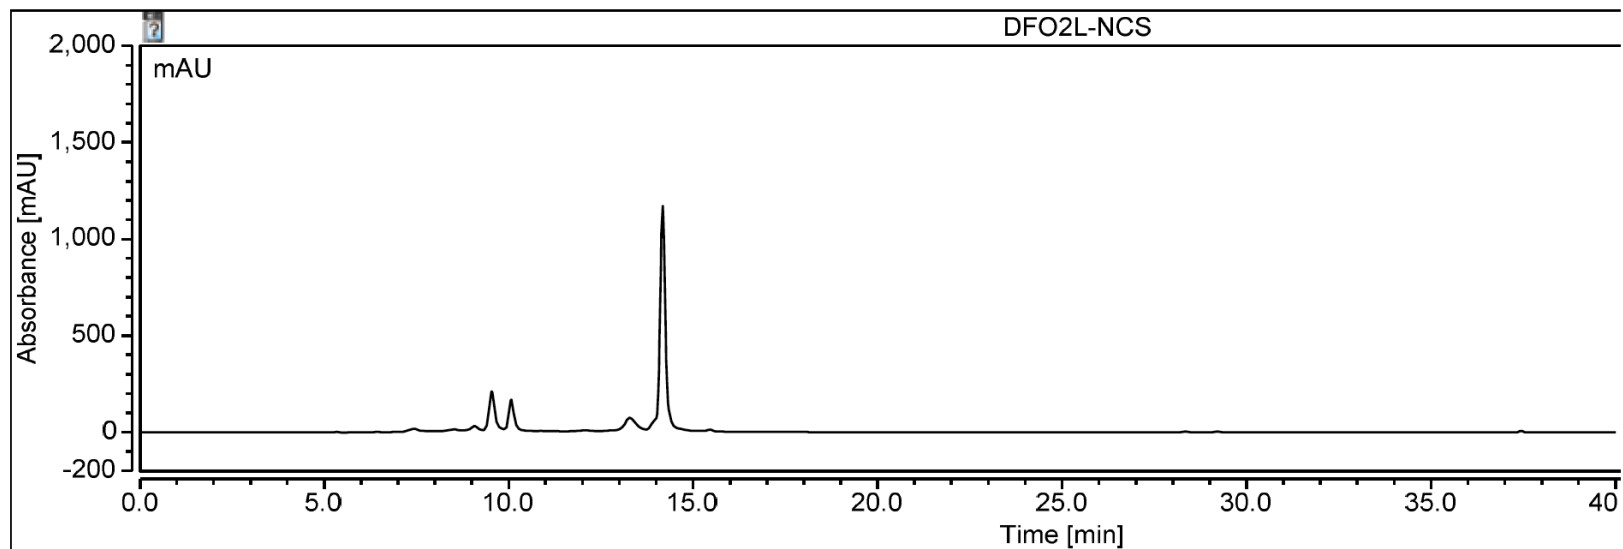

**Figure S13.** Analytical HPLC chromatogram for *p*-Ph-SCN-DFO2K. HPLC conditions: C18 Inspire analytical DIKMA; 5  $\mu$ m, 250  $\times$  10.0 mm; (30 – 60% acetonitrile in water (0.1% formic acid)); flow rate, 2 mL/min,  $t_R$  = 14.3 min)

**XYZ Coordinates of Zr(DFO2K) optimized structure \***

94

|   |          |           |         |
|---|----------|-----------|---------|
| N | 49.79700 | -90.21100 | 0.67300 |
| C | 48.63600 | -89.60800 | 0.32000 |
| C | 47.36800 | -90.24200 | 0.95300 |

|   |          |           |          |
|---|----------|-----------|----------|
| C | 46.07400 | -89.69800 | 0.33900  |
| C | 44.81500 | -90.17400 | 1.06800  |
| O | 48.57500 | -88.58600 | -0.39000 |
| N | 47.45300 | -91.70700 | 0.95800  |
| C | 51.11200 | -89.87900 | 0.13100  |
| C | 51.72400 | -91.08000 | -0.59800 |
| C | 53.08100 | -90.80800 | -1.25700 |
| C | 54.23600 | -90.53600 | -0.28500 |
| C | 55.55200 | -90.42200 | -1.05200 |
| N | 56.69200 | -90.03500 | -0.22200 |
| C | 57.93000 | -90.60200 | -0.32400 |
| C | 59.09400 | -89.80000 | 0.21200  |
| C | 60.43100 | -90.49600 | -0.00100 |
| C | 61.61300 | -89.53700 | 0.07900  |
| N | 62.82500 | -90.12200 | -0.08300 |
| C | 64.06800 | -89.36000 | -0.19100 |
| C | 65.24900 | -90.30500 | -0.38500 |
| C | 66.57700 | -89.57000 | -0.58200 |
| C | 67.74800 | -90.55000 | -0.67100 |
| O | 56.64800 | -88.68200 | 0.19400  |

|   |          |           |          |
|---|----------|-----------|----------|
| O | 58.07100 | -91.72900 | -0.85600 |
| O | 61.49100 | -88.30700 | 0.26100  |
| C | 69.09200 | -89.85900 | -0.90100 |
| N | 70.20500 | -90.78200 | -0.68200 |
| C | 70.94600 | -91.42300 | -1.57300 |
| C | 70.91800 | -91.15900 | -3.05200 |
| C | 72.34900 | -90.92300 | -3.59500 |
| C | 72.96600 | -89.67300 | -2.98600 |
| N | 73.63500 | -89.86300 | -1.82200 |
| C | 74.01900 | -88.77000 | -0.92900 |
| C | 72.82500 | -88.19500 | -0.15200 |
| C | 73.25800 | -87.24900 | 0.98800  |
| C | 72.59200 | -87.51100 | 2.34800  |
| C | 73.09400 | -88.73700 | 3.13400  |
| N | 72.51500 | -90.03600 | 2.78200  |
| C | 71.55500 | -90.67500 | 3.44100  |
| C | 70.86600 | -90.05300 | 4.61800  |
| O | 70.42600 | -91.08500 | 0.62700  |
| O | 71.79800 | -92.28500 | -1.11600 |
| O | 72.81500 | -88.54600 | -3.50800 |



|   |          |           |          |
|---|----------|-----------|----------|
| O | 71.21200 | -91.85300 | 3.03600  |
| O | 73.09200 | -90.69400 | 1.72800  |
| N | 50.72500 | -95.89500 | 0.66700  |
| C | 51.43600 | -97.15000 | 0.88900  |
| C | 52.89400 | -97.07200 | 0.41600  |
| C | 53.72000 | -95.99600 | 1.12900  |
| C | 55.16600 | -95.91600 | 0.63200  |
| C | 55.93500 | -94.77200 | 1.30000  |
| N | 57.30800 | -94.64000 | 0.82000  |
| C | 58.37800 | -95.24000 | 1.42800  |
| C | 59.67000 | -95.27000 | 0.63300  |
| C | 60.86900 | -95.71600 | 1.46700  |
| C | 61.99600 | -96.23600 | 0.59000  |
| N | 63.24800 | -95.81800 | 0.89500  |
| C | 64.41500 | -96.29300 | 0.15200  |
| C | 65.71300 | -95.61900 | 0.59300  |
| C | 66.86600 | -96.07100 | -0.31300 |
| C | 68.20200 | -95.33500 | -0.14000 |
| O | 57.41500 | -94.32600 | -0.55400 |
| O | 58.27100 | -95.71800 | 2.57700  |

|   |          |           |          |
|---|----------|-----------|----------|
| O | 61.78300 | -97.03600 | -0.34800 |
| C | 69.02800 | -95.75100 | 1.08500  |
| N | 70.35800 | -95.12800 | 1.05800  |
| C | 71.41400 | -95.50600 | 0.33500  |
| C | 71.55000 | -96.90500 | -0.20500 |
| C | 72.63200 | -97.69300 | 0.56700  |
| C | 72.13600 | -98.21700 | 1.90600  |
| N | 72.80700 | -97.87800 | 3.03600  |
| C | 73.92200 | -96.93800 | 3.20400  |
| C | 75.29900 | -97.56700 | 2.97100  |
| C | 76.47100 | -96.58300 | 3.12100  |
| C | 76.40200 | -95.36800 | 2.16900  |
| C | 75.86400 | -94.06800 | 2.81500  |
| N | 74.86800 | -93.36400 | 1.99300  |
| C | 75.09200 | -92.79600 | 0.81500  |
| C | 76.47600 | -92.56000 | 0.29700  |
| O | 70.40100 | -93.85100 | 1.56700  |
| O | 72.36700 | -94.66700 | 0.17100  |
| O | 71.14200 | -98.97800 | 1.95200  |
| O | 74.08500 | -92.42600 | 0.09500  |

|    |          |           |          |
|----|----------|-----------|----------|
| O  | 73.56900 | -93.49700 | 2.41100  |
| C  | 49.66000 | -95.72400 | -0.15800 |
| C  | 49.26900 | -94.27000 | -0.36900 |
| C  | 47.82400 | -93.93900 | 0.04400  |
| C  | 47.60300 | -92.45200 | -0.17200 |
| O  | 49.05900 | -96.66300 | -0.72100 |
| O  | 47.65300 | -91.93700 | -1.30500 |
| Zr | 72.07200 | -92.54800 | 1.07300  |
| C  | 43.53300 | -89.58800 | 0.46800  |
| C  | 42.26300 | -90.09300 | 1.14900  |
| N  | 41.05800 | -89.51700 | 0.51800  |

\* Density Functional Theory calculations performed by using Material Studio software via DMol<sup>3</sup>/PBE.
